# Supplementary material for: The Prevalence of Arctic Multilayer Clouds and their Observed and Modelled Characteristics
Source: Copernicus journal article supplement (doi:10.5194/egusphere-2025-5070), 2025-10-22
Supplement: Supplementary file [file egusphere-2025-5070-AC2-supplement.pdf]

# Author Response to Reviewer #2

The authors thank Reviewer #2 for their detailed review. We have addressed your comments. Please see the response to each point below in red. Figures in this reply are ordered with capital letters to distinguish them from the figures in the manuscript.

## Changes to the paper not discussed in the Authors' Comments:

- We found an inconsistency in the way the warm (above 0°C) clouds are treated in the RS+Radar product. These clouds were not constrained by a 150m gap. The same threshold as for cold clouds (>150m gap) is now applied, and thus, RS+Radar is updated accordingly in Fig. B. Also, values for the RS product have changed due to an update in the observational algorithm.
- There were some inconsistencies in the development of the two algorithms; this has now been rectified. All model data has been updated with a 150m gap threshold. Overall, small changes are induced (MLC occurrence for 1E-9 kg/kg goes from 77% to 76%).
- Updated acknowledgements to follow the HoreKa suggested structure
- Updated Fig. A1 with [ ] brackets instead of ( ) for the units

---

## Major Points

1. The significant difference in Liquid Water Path and Frozen Water Path between the model and observations. Due to the high sensitivity on cloud mass thresholds, are the authors just coincidentally matching the observations on cloud occurrences, since the simulations have severe differences on quantities as fundamental as FWP and LWP?

We can acknowledge the significant differences in FWP and LWP and understand the point made by the reviewer. Modelling Arctic clouds is a challenging topic, and many models (Line 420) struggle with capturing these fundamental variables.

As can be seen in Fig. 4, the overall structure does compare quite well between the model and the observations. Thus, we continue with the assumption that the model is adequately capturing the clouds as seen in the observations. The LWP/FWP bias is therefore rather seen as an artefact of “too weak” clouds rather than a completely different set of clouds.

However, as the comment might also refer to the comparison of modelled clouds with a cloud mass threshold of 1E-9 kg/kg to the observed clouds, we have expanded on this section and are now including a higher cloud mass threshold (now referred to as CMT) of 1E-5 kg/kg, as the reviewer suggested below, that better corresponds to the observed MLC frequency, Fig.7 and Fig. 8 are thus updated accordingly. The following analysis and the seeding table are also extended to show all CMTs in an effort to be less absolute in terms of choosing a CMT. See figures B and D below.

2. The cloud seeding mechanism discussion could be expanded. The authors compare 1st layer MLCs and SLCs. A similar comparison could be made between seeded and non-seeded MLCs.

Yes, this is an interesting aspect of these clouds. We have another paper in preparation that focuses on the differences between seeded and non-seeded MLCs and SLCs, where we explore this from a model perspective. As observations only indicate a possibility of seeding and not deterministically, we choose to omit the observations for further analysis in regards to seeded/non-seeded clouds.

3. It would be helpful to include mean vertical profiles of clear-sky vs. SLCs vs. MLCs for more intercomparison.

We continue with the assumption that this comment pertains to a temperature profile, as no other variable was specified. Below in Fig. A are the modelled mean vertical profiles of temperature for CS, SLC, and MLC profiles. Differences are only distinguishable in the lowest ~3km. A clear temperature inversion can be seen between 500 m and 1000 m in the CS profile. A gradual weakening of the stability is seen in the mean profile for SLCs and MLCs. 10m temperature (lowest model level) differs between -6°C for CS, -3°C for SLCs, and -2°C for MLCs. We currently do not see where this evaluation would fit into the manuscript and will keep this analysis in the Authors' comments.

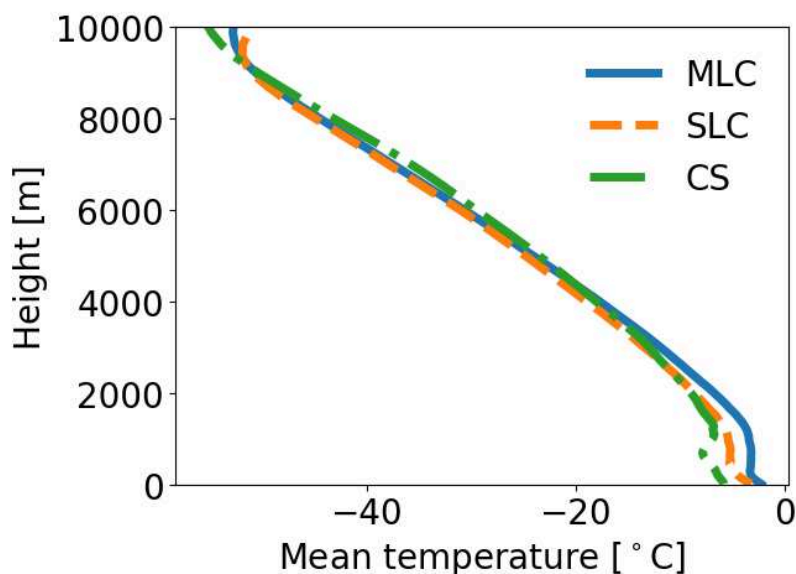

Fig. A Mean vertical temperature profiles.

Also, differences in radiation between the SLC layers and MLCs could be reported, as that could be one of the main causes for the differences between 1st layer MLCs and SLCs.

This aspect is also an interesting one when it comes to MLCs. In the paper in preparation, mentioned above, we also look into the radiative interaction between MLC/SLC and seeded/non-seeded clouds from a model perspective. This is also difficult to obtain from a ground-based observational perspective and is thus not further investigated here.

Specific comments:

In figs. 3 & B1, why are the mean values outside the range? The values outside 1.5 times the IQR are excluded to simplify the interpretation, hence the mean should be within that range

A slight miswording, the outliers are only visually excluded to aid the interpretation of the figure. Thank you for catching this.

We add to each figure with boxplots:

**“Values larger (or smaller) than these are outliers and are excluded (only in the figure) to simplify the visual interpretation.”**

The manuscript switches back and forth between using Celsius and Kelvin scale for temperatures. The readability could be improved by using a consistent unit (C?) for temperature throughout, and in cases where the other unit (K) needs to be used, provide the corresponding (C) values in parentheses.

Yes, thank you for noticing. Due to the fact that the parameterisation is in Kelvin, we will keep the units for this part. However, we add the corresponding values in Celsius throughout section 2.1.1, 5.1, and Fig.6

Since the novelty of the work is focused on the newly developed Arctic fit immersion freezing parameterization, the authors should directly compare results from the ICON model using the Arctic fit parametrization and ICON model using the H15 (Hande et al. 2015) parametrization.

This was done in Section 5.1

In Fig. 6, the temperature and qv are flipped in the figure compared to the caption and Discussion.

Thank you for noticing. The figure and captions are now matching.

Also, QV is referred to as specific humidity. QV is the water vapor mixing ratio, the ratio of water vapor mass to dry air mass, while specific humidity would be the ratio of water vapor to moist air mass.

Thank you for noticing. Fixed.

In figs. 7 and 9, the authors should have 2-layer MLCs next to SLC, as SLCs are similar to 2-layer MLCs than >4 layer MLCs. I understand the authors want to focus on the robustness of the 2-layer MLCs across observations and models with different thresholds, but it's more sensible for the order to be CS, SLC, MLC (2), MLC (3), MLC (4), MLC (>4). The colors of CS and SLC could be switched for readability to have clear sky be represented by blue.

We do not agree with the justification for swapping the order. The main part of the figure is reading the MLC occurrence, which gets increasingly problematic by swapping these to the top of the plot. Furthermore, the SLC frequency is similar to 2-layered clouds, but we believe this does not justify a less readable plot for the values that are discussed in the text.

The colour change is a good suggestion, and CS is now in blue. Following the reviewer comments below, we have added a new mass threshold, 1E-5 kg/kg. Now these cloud mass thresholds are referred to as CMT.

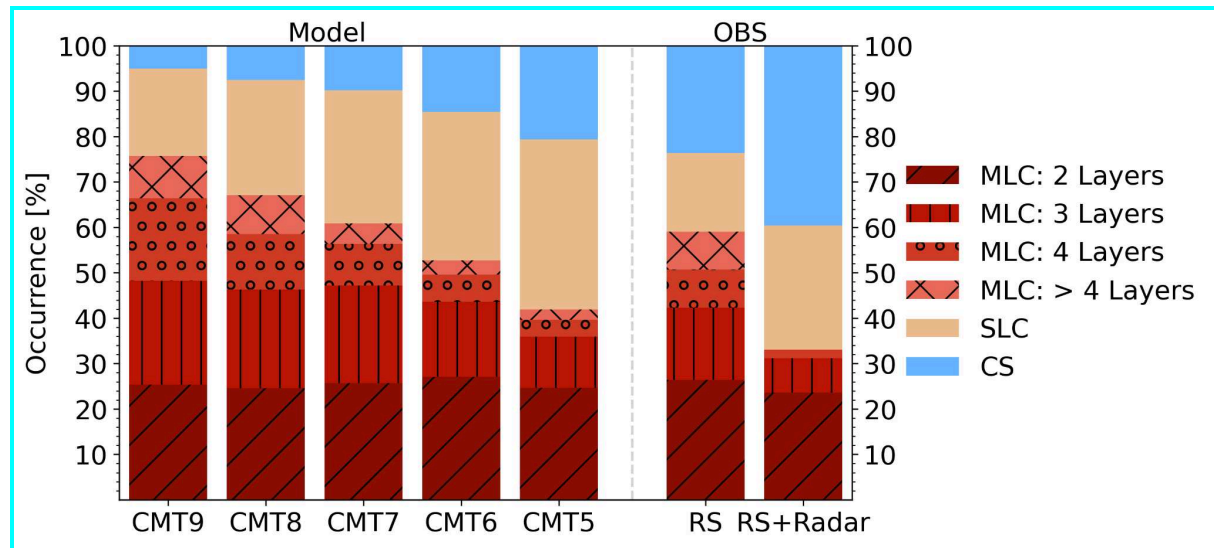

Fig B (Fig.7) with new colours and added CMT5 with updated values for the observational algorithm.

If the authors want to stress the robustness of 2-layer MLCs as more than just a coincidence, they need to do further analysis on what happens to the 3+ layer MLC regions when increasing the cloud mass threshold. What percentage of the 3+ layer MLC regions become CS / SLC / 2-layer MLCs upon increasing the threshold? What percentage of 2-layer MLC regions become CS / SLC upon increasing the threshold?

This is an interesting question. We have extended our analysis to look at this. We find a gradual change of cloud layers, most easily visualised in Fig. C below. For each threshold transition, CMT5 to CMT6, CMT6 - CMT7, etc, we have calculated the number of profiles (during the radiosonde times) that change cloud layer number or remain in the same category (CS, SLC, MLC2, MLC3, etc). We find that a majority of timesteps remain in the same category; meanwhile, the transition to a greater cloud number happens between 5-30% of the profiles. For a small number of occurrences, the cloud number is reduced with a lower CMT. This happens when two layers are vertically close with a relatively high cloud mass between the layers; thus, when decreasing the CMT, these two layers merge into one. This happens more frequently for categories with a greater cloud number. In general, the dominant category has more cloud layers that remain within that category. No clear trends when looking at the MLC2 category can be discerned. We thus refrain from making any hypotheses on whether this occurrence is purely random, constrained by the algorithms used to classify them, or a physical phenomenon.

We edit the manuscript accordingly.

**“... indicating that these cloud systems are easier to quantify across different methods”** is removed

And we change:

**“The similarities in the representation of the approximately 22% occurrence of**

two-layered clouds may be purely coincidental, constrained by the classifying algorithms, or a physical phenomenon we do not yet understand.”

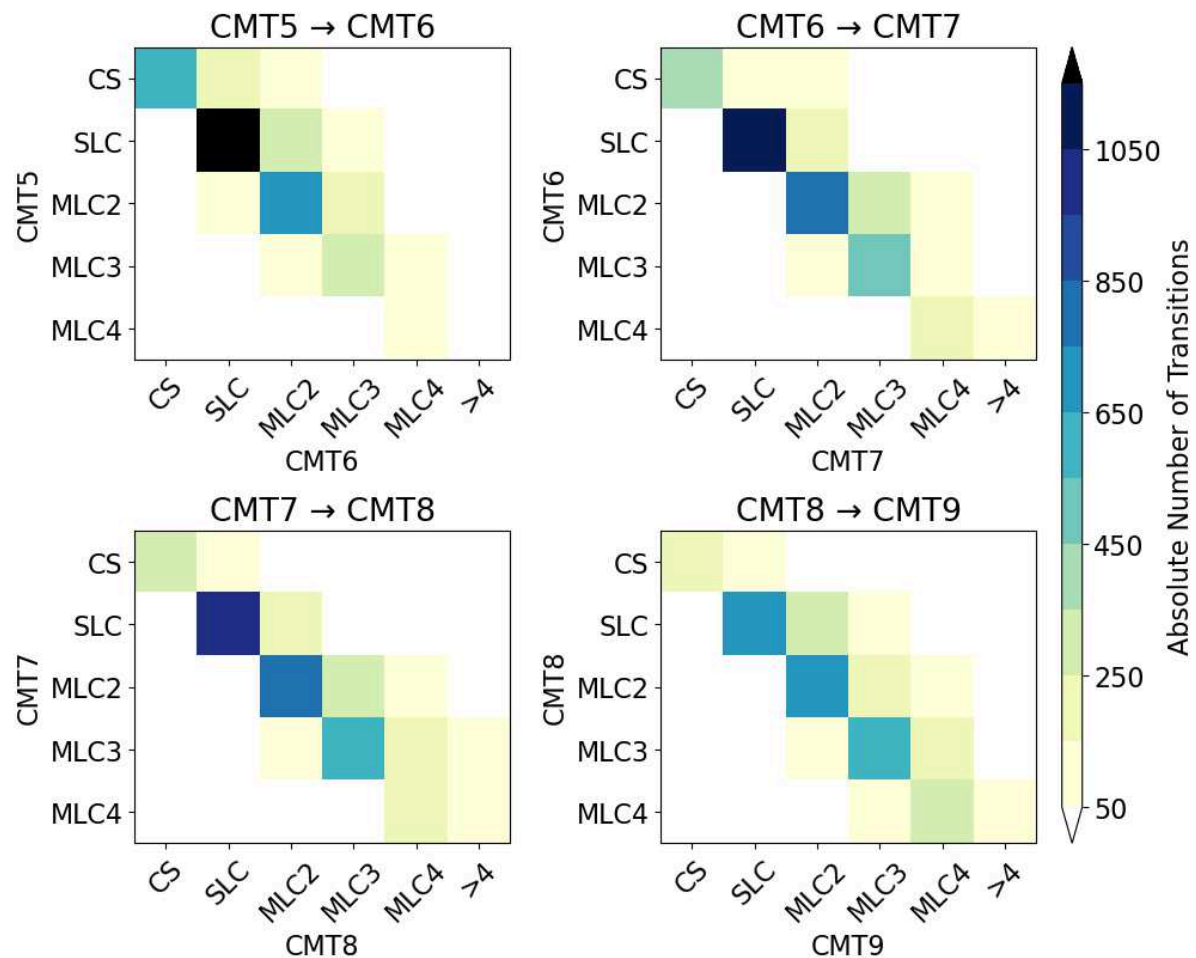

Fig C. Number of transitions for each CMT to the next lower CMT for CS, SLC, and the first three MLC categories. The colour indicates how many timesteps, identified with a higher CMT, are in the same or a different category for a lower CMT.

Line 291 “With a larger number of MLCs, either the SLCs or the clear-sky fraction has to decrease” - the lines before and after this mention the opposite, a decrease in MLCs and increase in SLC and clear-sky

Yes, we’ve inverted the sentence: **“With a smaller number of MLCs, either the SLCs or the clear-sky fraction has to increase.”**

One might argue that the “RS+Radar” observations are the best available data for comparison, as they are further validated by radar data. To that end, the authors should consider a cloud mass threshold of  $10^{-5}$  kg/kg, which following the trends in threshold would be closer to the RS+Radar data

We add a new CMT, CMT5 (1E-5 kg/kg) and have now updated Fig. 7 (See Fig. B above) and the following analysis on the heights and thicknesses of the clouds based on this larger threshold. We furthermore add the other CMTs to Fig. 8 (Fig. D below), and we report seeding occurrence for all CMTs.

Lines 327-329 - “This may be explained by a 12% (25%) occurrence of modelled thin MLC (SLC) layers that are less than 100m thick. These cloud layers would not be included in the observational algorithm.” - The authors should consider using the same cut-off thickness for the clouds as the observation algorithm.

For the cloud thickness, a 100m thickness for the observational algorithm was imposed to remove layers that may be due to uncertainty in the instruments. For the model, this uncertainty does not apply, and thus, we have neglected this threshold on the model data for the MLC detection, as it has no physical meaning. Furthermore, due to the discrete model levels that increase with height, the majority of the filtered clouds would be in the boundary layer. To show this, we filter the model data for thicknesses below 100m, the plot is shown in Fig. D below.

Overall, small shifts can be seen in the model data, but it is a more accurate comparison, so we update the manuscript accordingly.

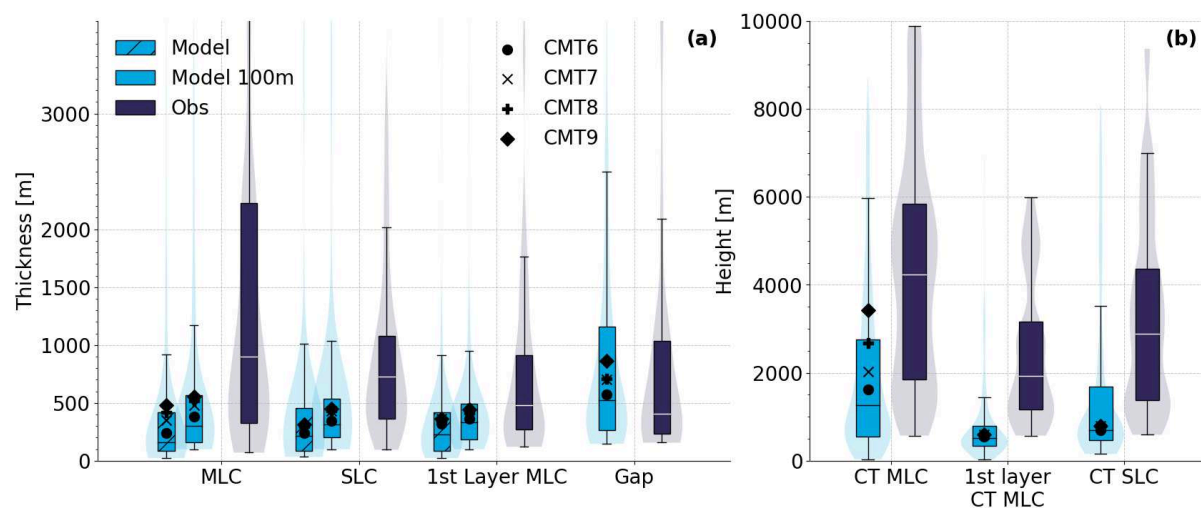

Fig. D (Fig. 8) Cloud thickness and cloud gap thresholds are more consistently treated in the RS+Radar product. CT heights are shifted up due to the removal of cloud layers below the lowest radar gate (see Achtert et al. (2025) for details.)

The sentence in question is updated for the CMT5-CMT9 comparison.

**“For the unfiltered data, this may be explained by a 12% - 32% (25%-31%) occurrence of modelled thin MLC (SLC) layers that are less than 100m thick for CMT5 - CMT9. For the filtered data, discrepancies may be due to the significant differences in water paths discussed above.”**

We also added a clarification.

**“Due to uncertainty, cloud layers below 100m are not included in the observational algorithm. We thus filter the clouds identified in the model algorithm similarly. Figure 9a shows both the unfiltered and the filtered model data (“Model 100m”).”**

Line 332 – “(39m and 22m difference in model and observations, respectively)” – It would be better to report these differences in median thicknesses as percentages.

Ok. Updated the sentence also to include the CMTs and the filtered model data (Model 100m).

**“However, we find that the median thickness of the 1st Layer MLC is similar to SLCs for the model (SLCs are 7% smaller - 0.8% larger (CMT5 - CMT9)). For the observations, the lowest layer is 33% thinner than SLCs.”**

Figs. 3, 5, 8 and B1 – Violin plots would give the readers a better understanding of the distribution of the microphysical and macrophysical quantities.

As we mainly discuss the medians in these figures, we’d like to keep the boxplots for readability, but we’ve added a violin plot outline in the background of each boxplot. See plots below (and Fig. D above).

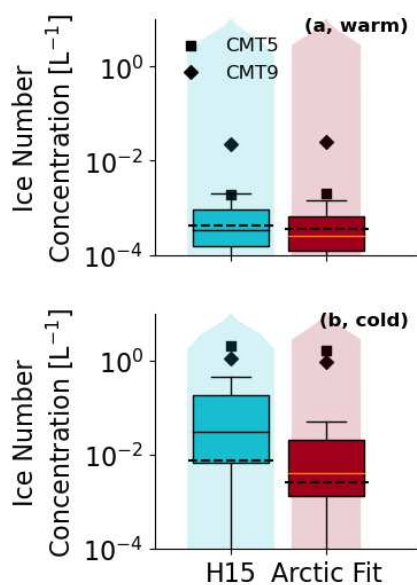

Fig. E (Fig. 3) with updates; CMT5 is shown in the boxplot and with the distribution in the violin plot. CMT9 means (diamonds) and medians (dashed black lines) are further shown for comparison.



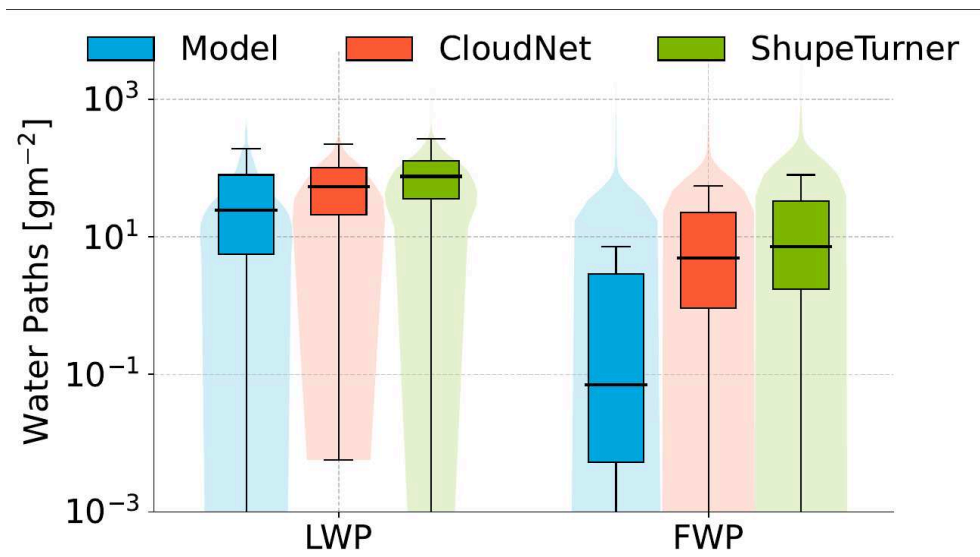

Fig. F (Fig. 5)

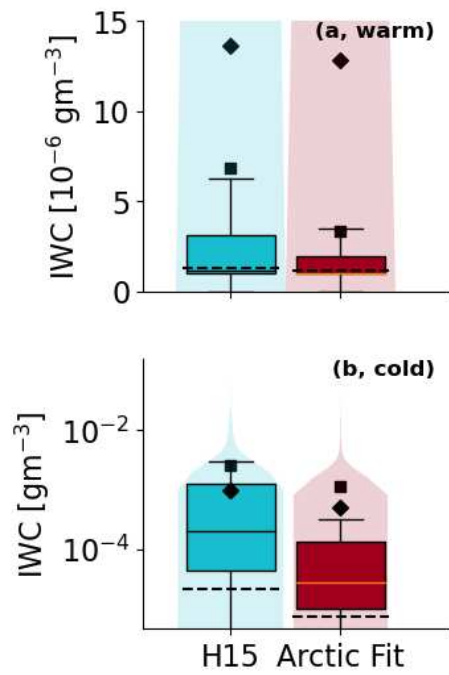

Fig. G (Fig. B1). With the same updates as Fig. D and with rectified units in b.
